# Supplementary material
Source: PubMed Central journal article supplement (PMC2613727)
Supplement: pp.108.128348_1.pdf [file pp.108.128348_1.pdf]

**Figure S2.** RNAi silencing vector pTSi-1 and the *OsGLP* RNAi construct. **(A)** Vector pTSi-1 contains the HBT35S promoter, which includes a minimal CaM35S enhancer plus the 5' UTR of maize *CDDPK* gene (1). The inverted *NOS* carry the antisense sequence of the *Agrobacterium NOS* terminator plus an 81 bp fragment of the 3' end of the *GFP* gene. A pair of *XcmI* sites is used to generate "T" 3' extensions for cloning PCR products. **(B)** RNAi silencing construct pTSi-*OsGLP* was constructed by inserting an antisense 500 bp PCR product of *OsGLP8-3* into the pTSi-1 RNAi vector. *NheI*-digested pTSi-*OsGLP* vector was inserted into *XbaI*-digested pCambia 1305 binary vector.

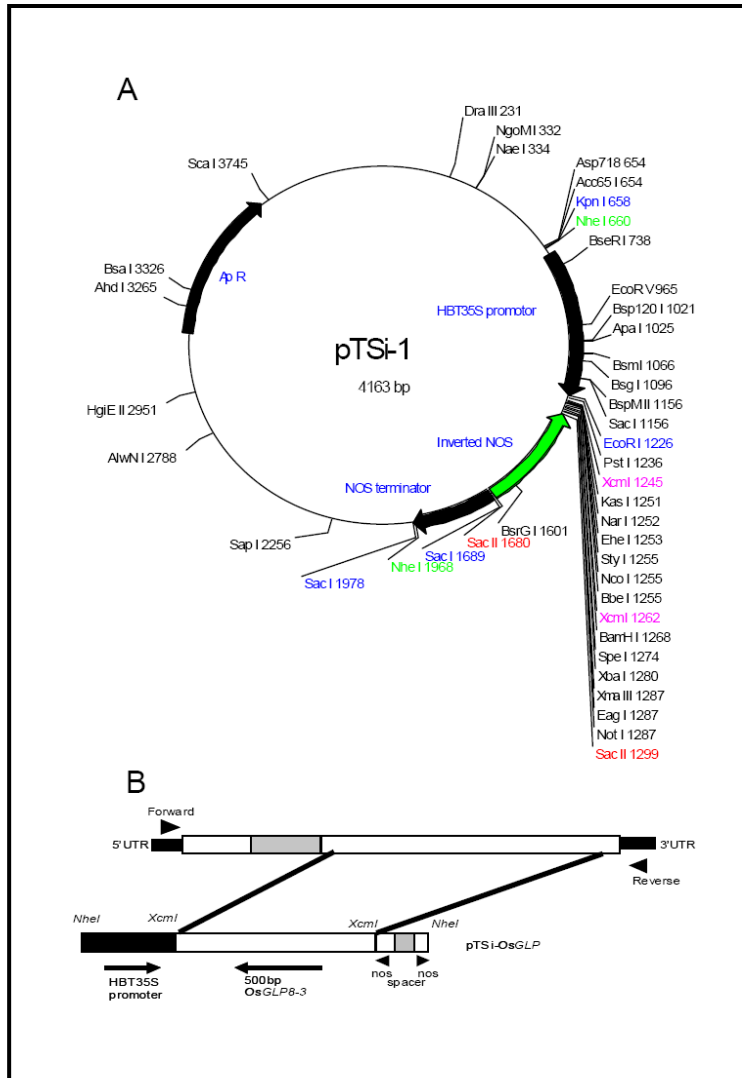



**Figure S4.** Disease phenotypes of Kitaake and Nipponbare after *Magnaporthe oryzae* (*Mo*) inoculation. **(A)** Spot inoculation of rice detached leaves of Kitaake (resistant) and Nipponbare (susceptible) with *Mo* isolate Che86061. **(B)** Spray inoculation of Kitaake and Nipponbare plants with *Mo* isolate Che86061.

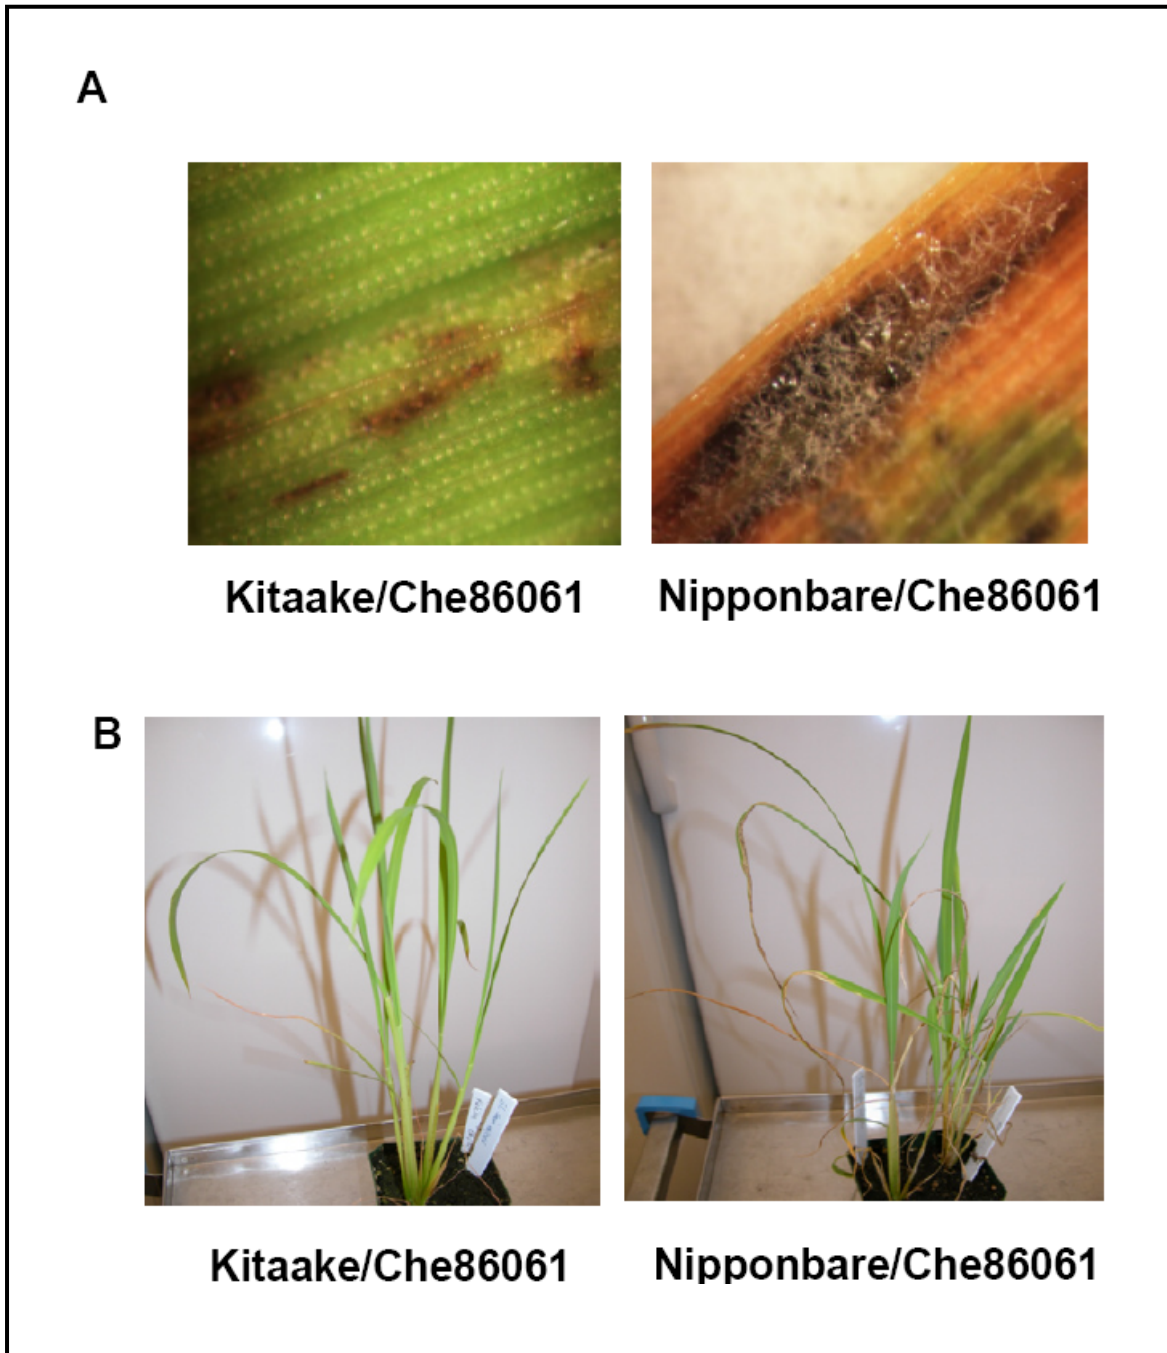

**Figure S5.** *OsGLP*-silenced  $T_1$  plants show higher levels of sheath blight disease. **(A)** Sheath blight disease scores of  $T_1$  RNAi transgenic plants assessed using the sheath blight disease index (2). Kitaake (WT, resistant control) and Lemont (LEM, susceptible control). **(B)** Sheath blight disease phenotypes on  $T_1$  silenced plants with different levels of gene suppression.

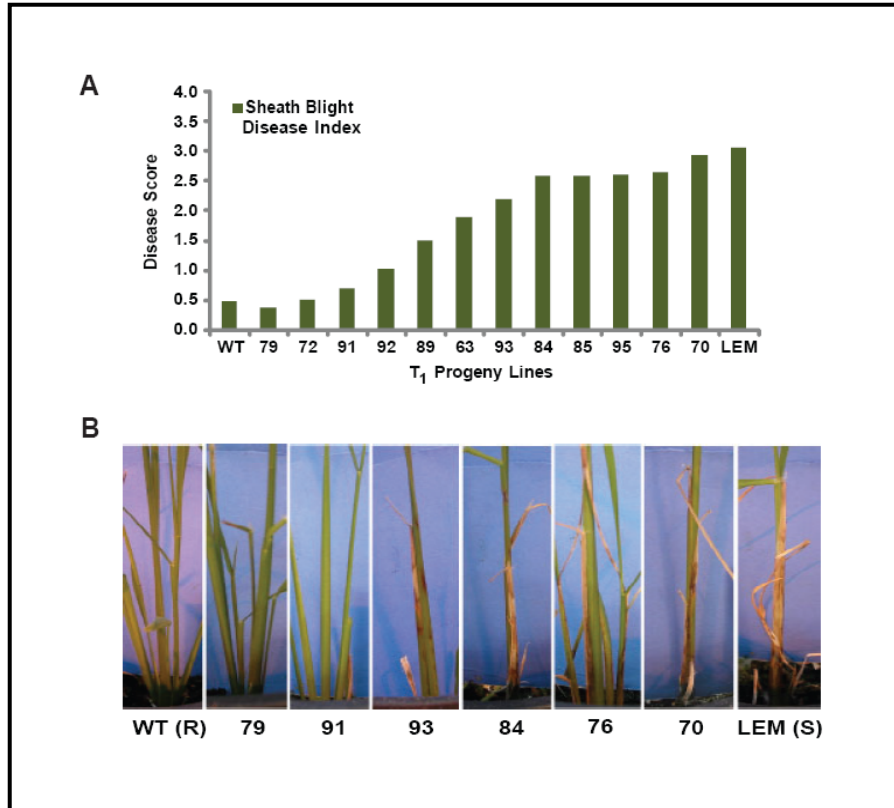

**Table S1.** Disease ratings for Sanhuangzhan 2 (SHZ-2, donor resistant parent), BC116 (backcross line harboring QTL from SHZ-2) and commercial cultivar Texianzhan 13 (TXZ-13, recurrent susceptible parent) after 7 yr of field evaluation in a rice blast nursery in Yangjiang, Guangdong, China.

| Year | Disease Scale <sup>a</sup> |             |             | t-value <sup>b</sup> | Significance |
|------|----------------------------|-------------|-------------|----------------------|--------------|
|      | SHZ-2                      | BC116       | TXZ-13      |                      |              |
| 2001 | 0.87±0.35                  | 5.40±1.35   | 9.00±0.00   | -11.0227             | 0.0000       |
| 2002 | 0.67±0.49                  | 4.73±1.83   | 8.33±0.98   | -8.08845             | 0.0000       |
| 2003 | 0.67±0.49                  | 4.87±1.77   | 9.00±0.00   | -9.05741             | 0.0000       |
| 2004 | 1.67 ± 0.98                | 4.02 ± 1.01 | 6.07 ± 1.49 | -3.5000              | 0.0035       |
| 2005 | 0.87 ± 0.74                | 2.87 ± 1.63 | 8.60 ± 0.83 | -12.1276             | 0.0000       |
| 2006 | 0.87 ± 0.74                | 6.60 ± 0.83 | 8.70 ± 0.83 | -5.9161              | 0.0000       |
| 2007 | 0.73 ± 0.46                | 2.73 ± 1.28 | 7.80 ± 1.01 | -11.7671             | 0.0000       |

<sup>a</sup> Panicle blast symptoms were evaluated on each rice line using IRRI Standard Evaluation System for Rice (<http://www.knowledgebank.irri.org/ses/SES.htm>). Data are averages of disease for the two crops for each year (mean ± standard error).

<sup>b</sup> t-test between BC116 and TXZ-13.

**Table S2.** Gene members of the barley germin-like protein (*HvGER*) subfamilies used for the phylogenetic analysis of the *OsGER* subfamilies in rice.

| Name of gene   | TIGR TC number <sup>a</sup> | Predicted protein size<br>(number of aa) |
|----------------|-----------------------------|------------------------------------------|
| <i>HvOxOa</i>  | Y142203                     | 224                                      |
| <i>HvOXOLP</i> | X93171                      | 229                                      |
| <i>HvGER1a</i> | TC140112                    | 224                                      |
| <i>HvGER1b</i> | TC148017                    | 215                                      |
| <i>HvGER1c</i> | TC141021                    | 223                                      |
| <i>HvGER1d</i> | TC148015                    | 228                                      |
| <i>HvGER2a</i> | TC146914                    | 212                                      |
| <i>HvGER2b</i> | TC147369                    | 212                                      |
| <i>HvGER3a</i> | TC131410                    | 226                                      |
| <i>HvGER3b</i> | TC131415                    | 227                                      |
| <i>HvGER3c</i> | TC131413                    | 226                                      |
| <i>HvGER4a</i> | TC139505                    | 228                                      |
| <i>HvGER4b</i> | H011H17                     | 229                                      |
| <i>HvGER4c</i> | TC139504                    | 211                                      |
| <i>HvGER4d</i> | TC147149                    | 229                                      |
| <i>HvGER4e</i> | TC139503                    | 229                                      |
| <i>HvGER5a</i> | TC147527                    | 216                                      |
| <i>HvGER5b</i> | TC147526                    | 216                                      |
| <i>HvGER6a</i> | TC141367                    | 219                                      |

<sup>a</sup> TC = Tentative Consensus sequences created by assembling ESTs into virtual transcripts. The TC annotation numbers corresponds to the *Hordeum vulgare* gene index (HvGI):

<http://compbio.dfci.harvard.edu/tgi>

**Table S3.** Oligonucleotide primers used in the study.

| Gene              | TIGR Locus ID <sup>a</sup> | Primer <sup>b</sup> | Sequence 5' - 3'             | T <sub>A</sub><br>(°C) <sup>c</sup> |
|-------------------|----------------------------|---------------------|------------------------------|-------------------------------------|
| 8-1               | LOC_Os08g08920             | GLP1F               | CAGGAAACACAAAGCATCTGATCAGG   | 57                                  |
|                   |                            | GLP1R               | CTTTGCAACACTATGGGACAATTA     |                                     |
| 8-2               | LOC_Os08g08960             | GLP2F               | GAAACCATAAAACACACAGGCATCTG   | 59                                  |
|                   |                            | GLP2R               | ATGTAGTATACTGTCCTTGATGGTG    |                                     |
| 8-3               | LOC_Os08g08970             | GLP3F               | CTCACCCAAAATAACGATAAACACAGGG | 56                                  |
|                   |                            | GLP3R               | ACGCACAAAGGAACAATCAAG        |                                     |
| 8-4               | LOC_Os08g08980             | GLP4F               | GGAGAAACCAACTCATAGTAGCTTAGC  | 52                                  |
|                   |                            | GLP4R               | GCATCAATTGATTAGGGAGAATCAG    |                                     |
| 8-5               | LOC_Os08g08990             | GLP5F               | GCAGAAATTAATCCAAAGCCGAAT     | 56                                  |
|                   |                            | GLP5R               | GTAACACAAAAGCTAATACATTG      |                                     |
| 8-6               | LOC_Os08g09000             | GLP6F               | CTTCCCATCAGAGAAAGATAGCAG     | 58                                  |
|                   |                            | GLP6R               | GATTCACGGTATGCCAACAAC        |                                     |
| 8-7               | LOC_Os08g09010             | GLP7F               | CAAAGCCAAATGGCTTCACCATCTTC   | 58                                  |
|                   |                            | GLP7R               | GCAGAATAGAAACTTATACATAGTATAA |                                     |
| 8-8               | LOC_Os08g09020             | GLP8F               | CAAATGGCTTCACCATCCTTCTGCCTA  | 59                                  |
|                   |                            | GLP8R               | CATAGAGTCCGTAAGCGGAC         |                                     |
| 8-9               | LOC_Os08g09040             | GLP9F               | CAGTAGAGAAGATAGCAGAAACCC     | 57                                  |
|                   |                            | GLP9R               | GTATGCATAACAAGTACAAACTCC     |                                     |
| 8-10              | LOC_Os08g09060             | GLP10F              | GCCAAGTAAATGGCTTCACCATC      | 52                                  |
|                   |                            | GLP10R              | GTACAAACTCCATACCACTTATTTATG  |                                     |
| 8-11              | LOC_Os08g09080             | GLP11F              | GCTAATTAAGAAGGGCATTAGAATGGC  | 59                                  |
|                   |                            | GLP11R              | GTTATGTGCAGTTACAGAGATCCTGC   |                                     |
| 8-12              | LOC_Os08g13440             | GLP12F              | GCTAGCTAACTACCAGAGAGAGATAC   | 59                                  |
|                   |                            | GLP12R              | CCTCCCATACACAAAAGCAC         |                                     |
| 12-1              | LOC_Os12g05840             | GLP14F              | ATCAACTATAGCTATACAAGAAT      | 53                                  |
|                   |                            | GLP14R              | GTAGTGTTATACATTATTGATGCGT    |                                     |
| 12-2              | LOC_Os12g05860             | GLP15F              | TAGACTACAGCTATACAAGAAGCAT    | 53                                  |
|                   |                            | GLP15R              | CTCTTTTACTACCAATCACTAGTTTTG  |                                     |
| 12-3              | LOC_Os12g05870             | GLP16F              | CAAGCTAGCATCGAGTAATACTTC     | 53                                  |
|                   |                            | GLP16R              | GATAACTAATTTTCAACAGATAAGCATC |                                     |
| 12-4              | LOC_Os12g0580              | GLP17F              | GACTACTTCTACAGGATCTGTAG      | 53                                  |
|                   |                            | GLP17R              | CCTTTTATACCAATCACTAATTCTGA   |                                     |
| <i>EF1α</i>       | D63582                     | EF1α1F              | AGCCTCGTTCAAATGGTGGT         | 57                                  |
|                   |                            | EF1α1R              | TAGTGCACATTGCGAGCAGA         |                                     |
| <i>Hygromycin</i> | AF354046                   | HygroF1             | GAGCCTGACCTATTGCATCTCC       | 54.5                                |
|                   |                            | HygroR1             | GGCCTCCAGAAGAAGATGTTGG       |                                     |
| <i>CaMV35S</i>    | AY234331                   | CaMVR1              | CGTGCTCCACCATGTTGGCAAGC      |                                     |

<sup>a</sup> TIGR Rice Genome Annotation: <http://www.tigr.org/tdb/e2k1/osa1/>

<sup>b</sup>F = forward primer, R = reverse primer

<sup>c</sup>T<sub>A</sub> = annealing temperature

### References:

1. Zhao B (2004) Isolation and characterization of the maize nonhost resistance gene *Rxo1* and the corresponding bacterial effector gene *avrRxo1* from *Xanthomonas oryzae* pv. *oryzicola*. *Doctorate thesis*.
2. Jia Y, et al. (2007) Rapid determination of rice cultivar responses to the sheath blight pathogen *Rhizoctonia solani* using a micro-chamber screening method. *Plant Dis* 91:485-489.
